# Supplementary material for: A promoter toolbox for tissue-specific expression supporting translational research in cassava (Manihot esculenta)
Source: PubMed Central journal article supplement (PMC9807883; doi:10.3389/fpls.2022.1042379), 2022-12-20
Supplement: DataSheet_2.pdf [file DataSheet_2.pdf]

## Supplemental Material

### Description of sampling position and organ/tissue composition

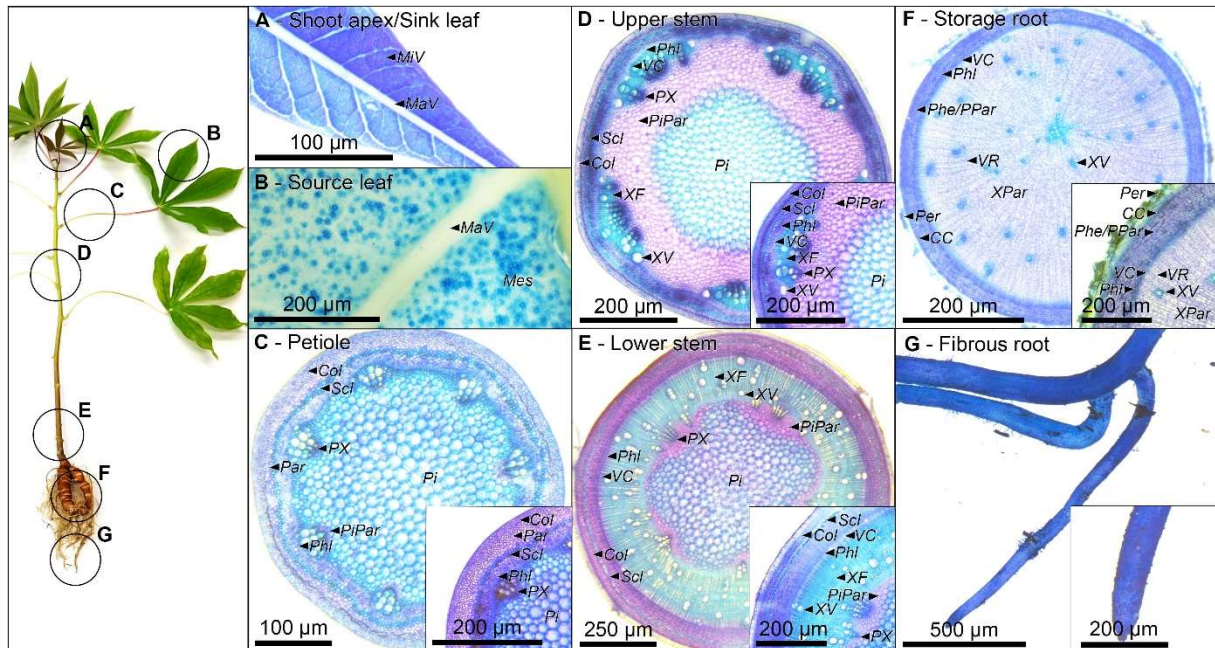

**Figure S1**\_Sampling positions and tissue descriptions. Different organs and organ sections were sampled from three-month-old cassava 60444 plants grown in the greenhouse and counterstained with 10% toluidine blue solution. Numbered circles, in the left figure panel, indicate the approximate sampling position of the respective samples used for GUS staining. The samples were taken from cassava plants transformed with promoter::*uidA* constructs and analyzed for their tissue-specific staining patterns, indicating their respective promoter activity. Note the brownish color of developing (sink) leaves in circle A, easily distinguishable from the green, fully expanded source leaf in circle B. A) Newly emerging leaf/sink leaf, B) Source leaf, C) Petiole cross-section, D) Upper stem cross-section, E) Lower stem cross-section, F) Storage root cross-section, G) Fibrous roots. Abbreviations: Collenchyma (*Col*), Cork cambium (*CC*), Major vein (*MaV*), Mesophyll (*Mes*), Minor vein (*MiV*), Parenchyma (*Par*), Periderm (*Per*), Phelloderm (*Phe*), Phloem Parenchyma (*PPar*), Phloem (*Phl*), Pith Parenchyma (*PiPar*), Pith (*Pi*), Protoxylem (*PX*), Sclerenchyma (*Scl*), Vascular cambium (*VC*), Vascular rays (*VR*), Xylem fiber (*XF*), Xylem parenchyma (*XPar*), Xylem vessel (*XV*).

## Characterization of *pCaMV35S* – An ubiquitously active promoter in cassava

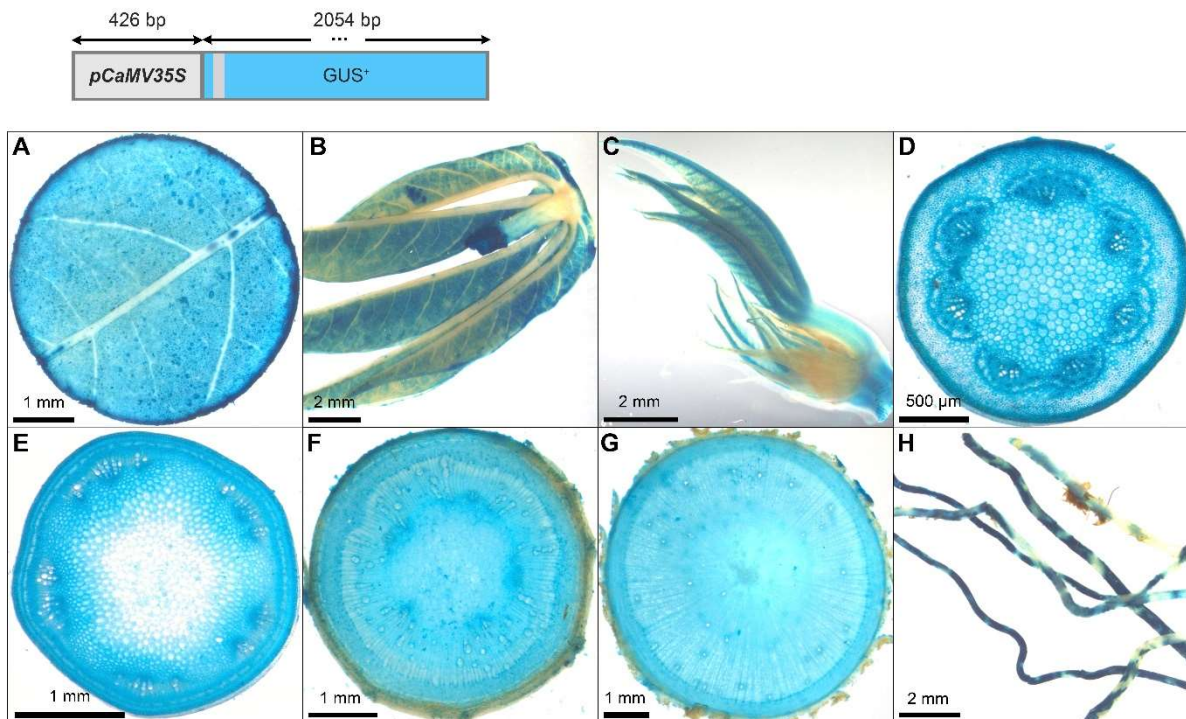

**Figure S2** Representative GUS staining pattern of three *pCaMV35S* promoter-reporter lines. A) Source leaf, B) Sink leaf, C) Petiole cross-section, D) Upper stem cross-section, E) Storage root cross-section, F) Fibrous roots.

**Characterization of *pStFBPase<sub>cyt</sub>:GUS* – An autotrophic promoter with additional activity in stems and storage roots of cassava**

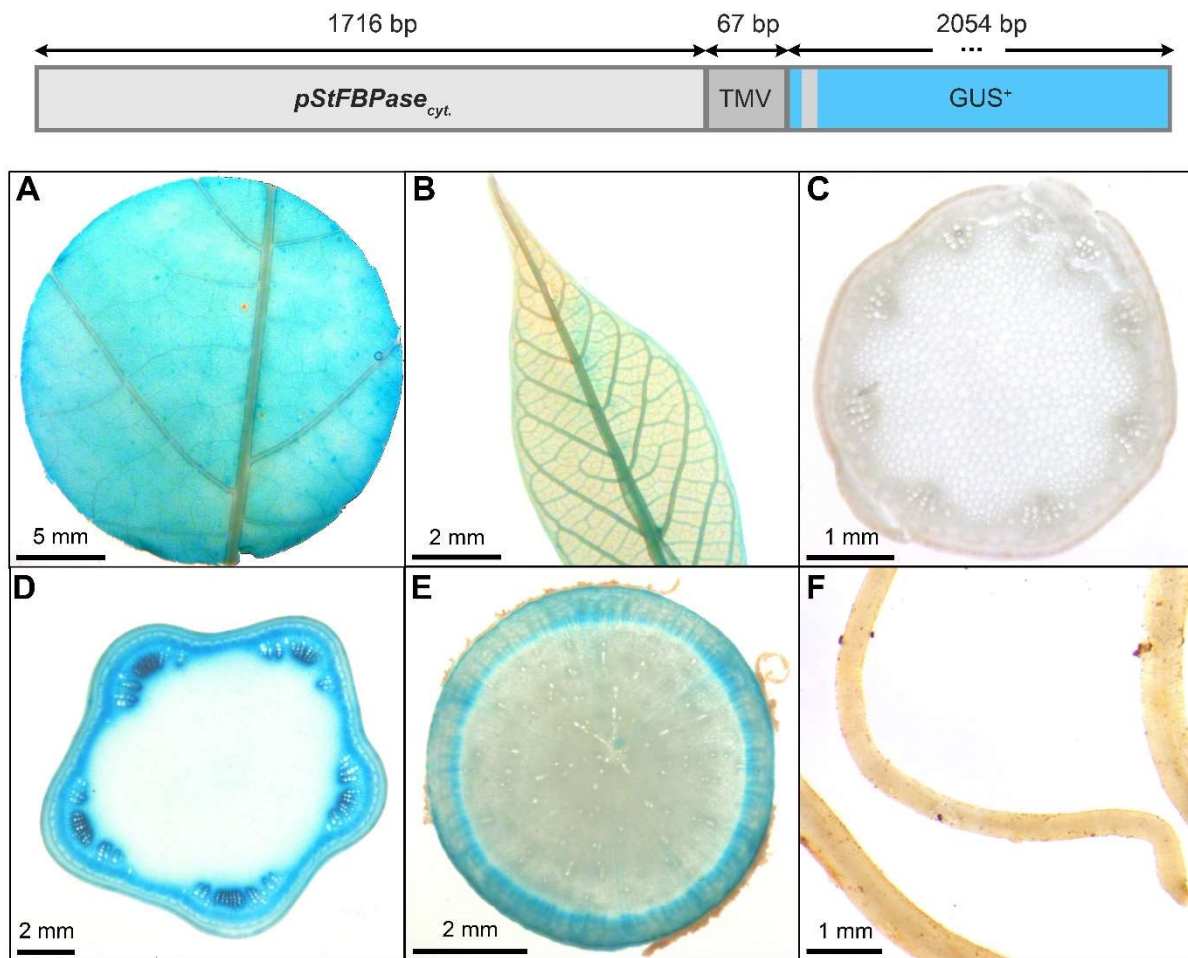

**Figure S3** Representative GUS staining pattern of four *pStFBPase<sub>cyt</sub>* promoter-reporter lines. A) Source leaf, B) Sink leaf, C) Petiole cross-section, D) Upper stem cross-section, E) Storage root cross-section, F) Fibrous roots.

Characterization of *pDjDIO3* – A strong but unspecific promoter in cassava

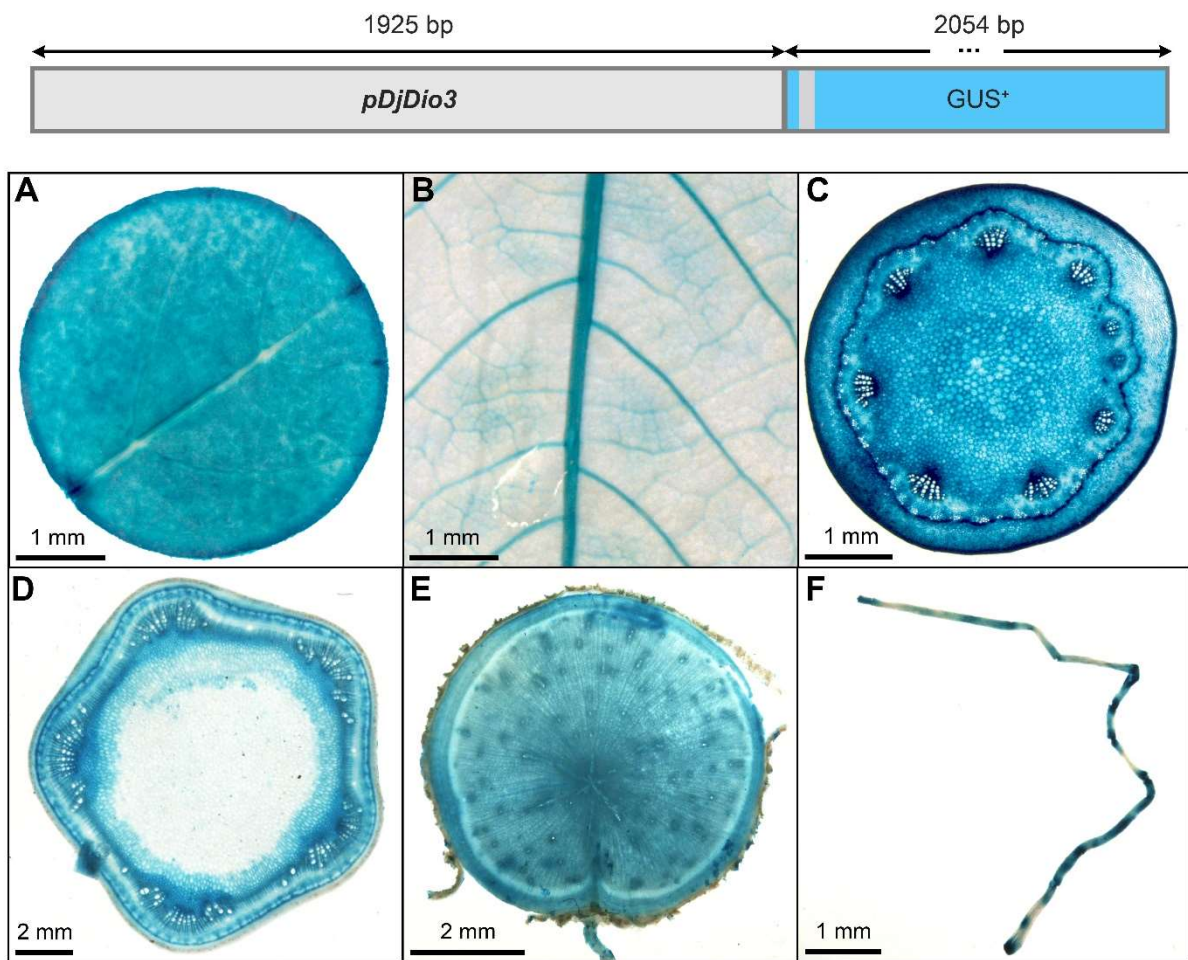

**Figure S4** Representative GUS staining pattern of four *pDjDIO3* promoter-reporter lines. A) Source leaf, B) Sink leaf, C) Petiole cross-section, D) Upper stem cross-section, E) Storage root cross-section, F) Fibrous roots.

## Primer test "uidA" qRT-PCR

*uidA*\_qPCR\_fwd GCGGCCAAAGTCCATCTCCG

*uidA*\_qPCR\_rev TGAAAGCCCGCAACGGTGTC

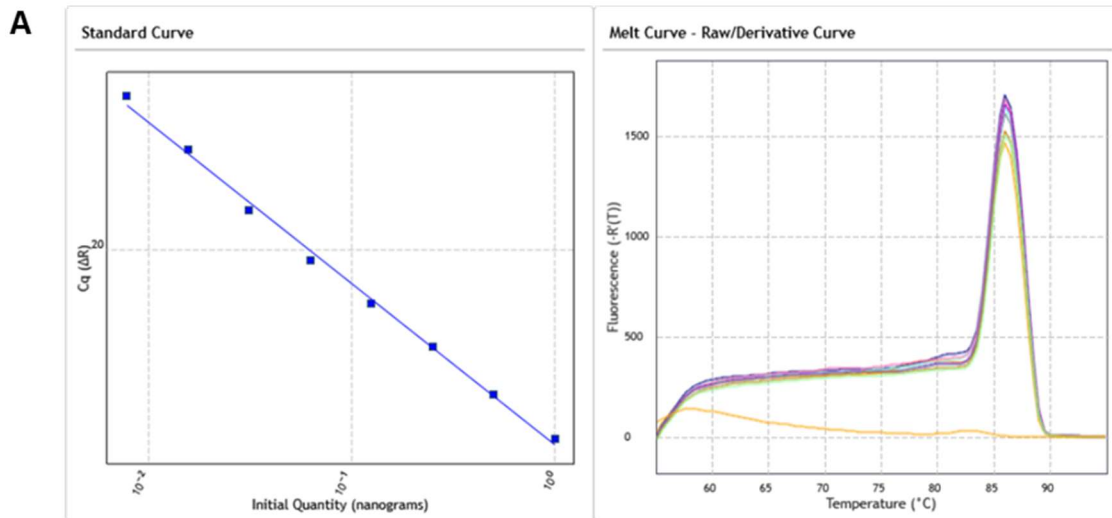

**B**

| Dilution/Control | Dye  | Target | Cq (ΔR) | R <sup>2</sup> (ΔR) | Slope (ΔR) | Efficiency (%) | Tm Product 1 |
|------------------|------|--------|---------|---------------------|------------|----------------|--------------|
| "1:1"            | SYBR | GUS    | 15.92   | 0.997               | -3.468     | 94.2           | 86           |
| "1:2"            | SYBR | GUS    | 16.89   | 0.997               | -3.468     | 94.2           | 86           |
| "1:4"            | SYBR | GUS    | 17.91   | 0.997               | -3.468     | 94.2           | 86           |
| "1:8"            | SYBR | GUS    | 18.83   | 0.997               | -3.468     | 94.2           | 86           |
| "1:16"           | SYBR | GUS    | 19.76   | 0.997               | -3.468     | 94.2           | 86           |
| "1:32"           | SYBR | GUS    | 20.86   | 0.997               | -3.468     | 94.2           | 86           |
| "1:64"           | SYBR | GUS    | 22.15   | 0.997               | -3.468     | 94.2           | 86           |
| "1:128"          | SYBR | GUS    | 23.29   | 0.997               | -3.468     | 94.2           | 86           |
| NTC              | SYBR | GUS    | 38.58   | 0.997               | -3.468     | 94.2           | 58           |

**Figure S5**\_Primer test "*uidA*\_qPCR\_fwd/rev". **A)** Standard curve and melting curve showing linear performance and desired melting curves. **B)** Tabular results demonstrating a suitable determination coefficient and primer efficiency. Report was created using Agilent "AriaMx" software.

### Primer test "*MeGAPDH*" qRT-PCR

*MeGAPDH*\_qPCR\_fwdTCTTCGGCGTTAGGAACCCAG

*MeGAPDH*\_qPCR\_rev GCAGCCTTATCCTTGTCGGTG

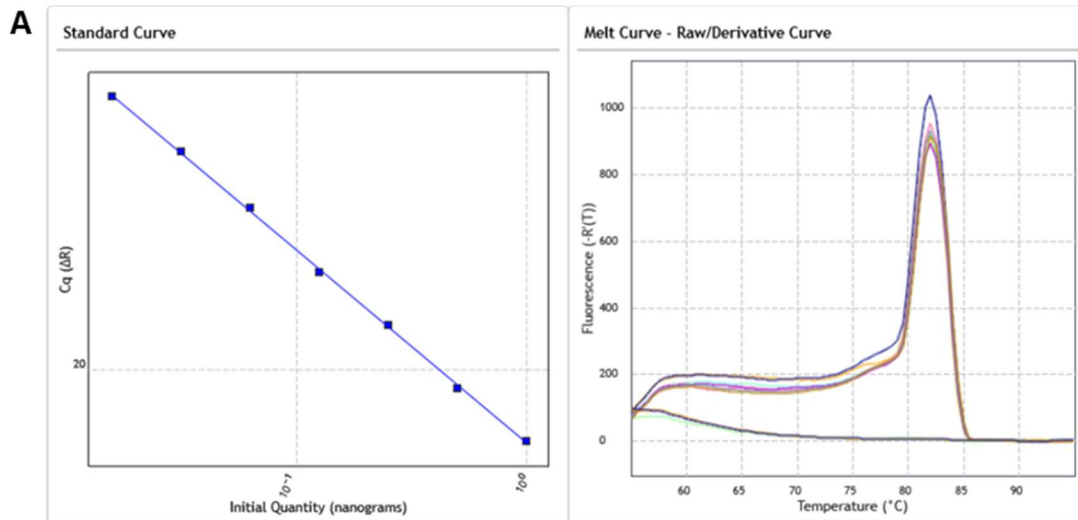

**B**

| Dilution/Control | Dye  | Target | Cq (ΔR) | R <sup>2</sup> (ΔR) | Slope (ΔR) | Efficiency (%) | Tm Product 1 |
|------------------|------|--------|---------|---------------------|------------|----------------|--------------|
| "1:1"            | SYBR | GUS    | 18.74   | 0.999               | -3.379     | 97.7           | 82           |
| "1:2"            | SYBR | GUS    | 19.66   | 0.999               | -3.379     | 97.7           | 82           |
| "1:4"            | SYBR | GUS    | 20.78   | 0.999               | -3.379     | 97.7           | 82           |
| "1:8"            | SYBR | GUS    | 21.7    | 0.999               | -3.379     | 97.7           | 82           |
| "1:16"           | SYBR | GUS    | 22.82   | 0.999               | -3.379     | 97.7           | 82           |
| "1:32"           | SYBR | GUS    | 23.83   | 0.999               | -3.379     | 97.7           | 82           |
| "1:64"           | SYBR | GUS    | 24.78   | 0.999               | -3.379     | 97.7           | 82           |
| NTC              | SYBR | GUS    | No Cq   | 0.999               | -3.379     | 97.7           | 57.5         |

**Figure S6**\_Primer test "*MeGAPDH*\_qPCR\_fwd/rev". **A)** Standard curve and melting curve showing linear performance and desired melting curves. **B)** Tabular results demonstrating a suitable determination coefficient and primer efficiency. Report was created using Agilent "AriaMx" software.

## Promoter sequences used in this study

### *Solanum tuberosum* B33 GENE

aaatcattgTTTTATTTCTCTTCTTTTTACAGGTATAAAAGGTGAAAATTGAAGCAAGATTGATTG  
caagctatgtgtcaccacgttattgatactttggaagaaatTTTACTTATATGTCTTTGTTAGGAG  
taatatTTGATATGTTTAGTTAGATTTTCTTGTCAATTTATGCTTTAGTATAATTTAGTTATTTTA  
TTATATGATCATGGGTGAATTTTGATACAAATATTTTGTCAATTAATAAATTAATTTATCACAACCT  
gattactttcagtgacaaaaatgtattgtcgtagtaccctTTTTTGTGGAATATGAATAATTTTTT  
tTTTTGTGACAATTGTAATTGTCACTACTTATGATAATATTTAGTGACATATATGTCGTCGGTAAAA  
gcaaacactttcagtgacaaaataatagatttaatcacaaaattattaacctTTTTTATAATAATAAA  
TTTATCCCTAATTTATACATTTAAGGACAAAGTATTTTTTTATATATAAAAAATAGTCTTTAGTGAC  
gatcgtagtgttgagctagaaatcataatgTTGAATCTAGAAAAATCTCATGCAGTGTAATAAAC  
CTCAAAAAGGACGTTcagTCCATAGAGGGGGTGTATGTGACACCCCAACCTCAGCAAAAAGAAAACCTC  
ccttcaacaaggacatttgcggtgctaacaatttcaagtctcatcacacatatatttattatataat  
actaataaagaatagaaaaggaaaggtaaacatcattaaatcgtctttgtatatttttagtgacaact  
gattgacgaaatctTTTTCGTCACACAAAATTTTtagtgacgaaacatgatttatagatgatgaaatt  
atTTGTCCCTCATAATCTAATTTGTTGTAGTGATCATTACTCCTTTGTTTGTATTATTGTcatgtta  
gtccatataaaaaaataatctctctcttattgtacgtgaatggttggaaacggatctattatataatac  
taataaagaatagaaaaggaaagtgagtgaggttcgagggagagaatctgtttaatatcagagtcga  
tcatgtgtcaatTTTATCGATATGACCCTAACTTCAACTGAGTTTAACCAATTCGATAAGGCGAGAA  
atATCATAGTATTGAGTCTAGAAAAATCTCATGTAGTGTGGGGTAAACCTCAGCAAGGACGTTGAGTC  
catagaggggggtgtatgtgacaccccaacctcagcaaaaagaaaacctcccctcaagaaggacatttg  
cgggtgctaacaatttcaagtctcatcacacatatatatataataactaataaataatagaa  
aaaggaaaggtaaacatcactaacgacagttgcggtgcaaacctgagtgaggttaataaacatcactaac  
TTTTATTGGTTATGTCAAACCTCAAAGTAAAATTTCTCAACTTGTTTACGTGCCTATATATACCATGCT  
tgTTATATGCTCAAAGCACCAACAAAACCTTTCG

### *Manihot esculenta* BIDIRECTIONAL SUGAR TRANSPORTER SWEET1

ataagacggtatacataacttataaaactaaaatatttataattaggatatatcaatcacatataaat  
aattacgaactaattaaatattTTTTTTTTCAGTATCGTACGTAGAAAAGTCTCACCTCAATATGTCAC  
tatgtgacatgacataTTTTTGTGATTATATAATTTGCCTTAATACTTTGAATTGGGGCATATAAGA  
gagtgatttagtttCGTATTACATAATGACTTTGATTCAAAAATTCACAAAATTATTGATAATATGAAT  
atgaaaatcttatatagattaaattaataatgTTATAGGGATGATATTTACTAAATCAAACTTT  
taaaatattgTTGAAATTTGATTCGAATGTAATTAATAATTCAAATAAAATAAATAGTATCTTATT  
attagagTTTTATTACATAAATTTATTATTTTTATTTTTAAATATTACTATTAATAGGTTATTTcata  
tTTTTTAAAATTTATTAATAATTTTTATTTTTTTTTTATTAACAATAATTTTTTTATTTAATTTc  
gTTTTTTTTGTGCTTAAATATATAATAAAAAATTAATTTTTTTTAACTTTAAAATAAAATTTTAAA  
tatataataaaaaattaaaatTTTTTTTTATCGATTAAAAAGTACTTTTTAAAATTAAGTTAATGAAGA  
agaagaaagagaaattgagttatccaaaaagaagagaaaaatttgagagtcgcatgcattaaagtcac  
agcgtaaagtaattaataataaataatgactatTTGAGAGAAAAAAAATAGTGTTAAAATTTTTT  
TTTTATAATAAATTATTATAAAATAAATTTACATAAATTATATAAATTTTTATTTTTTTATTATTT  
ataagTATTTATCGTAATAAATATTATAACAAAACCTTGAATACGAATCATTcatatataaagttg  
gcattgaattaccatatttGTAAAGGAGGTA AAAATGGTGAGGCAGTTCTAAGTTGGATCTCAATTAT  
TGCGTGATAGTTTTTTTTTCTAATTCACAGCACATGAGAGAGGCTCATCTCTGCTACCTTTAACTTC  
CTTATCTCATAGTTTCTAATTAGGACTTTTTCTCCCTCTTTTTCCATTTATAGTAATTTCTGATTAAC  
ATTAATTTCTATTTATCATATTTcagaaatTTGTTTTAAAAATTTATAACCTTGAAAAGTTTCCTTT  
caaaaagtagatctgaagtgaagtaactTTTTTTATAAATTAATCAATTTTTTTATTAATTTACTGTT  
TACTGAAATTCAAATAGGAGACTTTATAATCTTAGGGTAAGAAAATTTTTAACTTTATTAACTATAAAT  
GTAAAATTTGAAATATGTCATTCCTTTCACAAAATTTACAATTTTCACAATTTTTTTAAAATAAAT  
ATTTAATAATAAACATCTAAATCAAGAATATCAGGAAAGTTTTTTTTTTTTTTTTTTTTTTAATTG  
TGGTGGAGTTGGACTTAGGTATACTAGATCTTTAATTCATCTCAACTTTTGAACAACCTCAGAGAAA  
TTTACAATAATTTCAAATATTATAAATTAGAATATGAATTTATAATATAAATATATAGAAATTTTA

tataaattttattattttttacagtgtaaaatcacgaatctggctattatttttacgctataaatcta  
catagaccgcctaattttttcctcaaggtgcagcgccattccctgtgagttactgtagccactg  
ttcatagacatcgctcgaattaccaaaagcaacttgaaaacaaggaaatttaacctcgctgttattg  
ttccttctctatataatccattggcacttccctcttccactcatcgattgacatttggtgaaccaac  
ctctgaactttcagtttgattcttcttgaaactatttggttcttgtctttgccttctcttttctttg  
aaggttatttctttcaatcttgctgaaa

*Cauliflower Mosaic Virus 35S*

Gtcaacatgggtggagcagcagactctgggtctactccaaaaatgtcaaagatacagtctcagaagatca  
aagggtattgagacttttcaacaaggataatttcgggaaacctcctcggattccattgccagcta  
tctgtcacttcatcgaaaggacagtagaaaaggaagggtggctcctacaaatgccatcattgcgataaa  
ggaaaggctatcattcaagatctctctgcccagcagtggtcccaaagatggacccccaccacgaggag  
catcgtggaaaaagaagaggttccaaccacgtctacaaagcaagtggattgatgtgacatctccactg  
acgtaagggatgacgcacaatcccactatccttcgcaagacccttctctatataaggaagttcattt  
catttgagaggacgc

*Arabidopsis thaliana CHLOROPHYLL A/B-BINDING PROTEIN*

Tttccggttgaaatgggtttgggtgaatatccggttcagttatatgggtggccggttggaaattggcttatt  
agttgtggccggttgttgaagccgttggattggtaagggagaagcagacttgtggctatgagtctatg  
accatgactcgtgattatggagctgtcttatgacctgacctcaccttgatctgggtggattccaatg  
ttttcttcttcttaataaaaatattatgggtcaatacaggtgctaattaagatggtaataatttctta  
tgtttctgtggtaaagtttgattcaattccgtagttttagataatcttatttccatacataaatttta  
tagttttatctactttgttcttatgttttatctctagccaagagttattattattatcagaagaagaa  
aaaaaaaaagaagcatatatacaaaaaggtttaataaaatgtattatacaaggcaattatccaaattttt  
tttgttttggtttacattgatgctctcaggatttcataaggatagagagatctattcgtatacgtgtc  
acgtcatgagtggtgttttcgccaatccatgaaacgcacctagatatctaaacacatatcaattgcg  
aatctgcgaagtgcgagccattaaccacgtaagcaaaacaatctaaacccccaaaaaaaaatctatg  
actagccaatagcaacctcagagattgatatttcaagataagacagtattagatttctgtattatat  
atagcgaaaatcgcatcaataccaaaccacc

*Comellina Yellow Mottle Virus*

Aattcatttcttaggggttctctcggatgtacaaaaatcaagcttcagccccacatcatttcaaaaa  
tatgtgacttctcagatgaaaaactagcaaacacctgaaggatgagaagctggttgggtatcctctca  
tatgctagaaattatattcaggatcctggcaaatgggtgcaaccactcagacaaaagatggcaccaac  
aggagacaagagaatgaatccagaaacatggaagatggtaagacagataaaaagaaaagggtgaaaaatc  
tcctgatcttcagttaccacctaagattcattcatcataatagagacggatgggtgtatgactggc  
tggggagccgtctgcaaatggaaaatgtcaaagcatgatccaagaagcaccgaaagaatttgtgccta  
tgctagtggtatcattcaatccaataaaaatcaacctcgatgcagagattcaggcggcaatccatggcc  
tggataaattcaaaatttattatcttgataaaaaggagctcataattcgtcagactgtgaagcaatt  
atcaaatttacaacaagacgaacgaaaataagccgtctagagttagatggttaacattttcagattt  
cttaacaggtcttggaaatcacagttacattcagagcacatagatggaaagcataatggcttagcagatg  
ctctatcaagaatgataaatttcatgttgagaaaaatgatgaatctccatacaggttcacttcatca  
gtagaggacgcactaaaggtctgcaatgatgatcacggaagaaatttgatatccgccgcatcaatga  
catcatcacagtactgaggagatgaatacttagccatgaagtagcgtgccaatattacctatgccttt  
attcgcagcgttagtggtcactgaaaggcataaagtttggttcgttcttatcaaaaacgaatcttatctt  
tgtaacttgggttaccgggtatgccggttcccaagctttatttcttatttaagcacttgtgtagtagc  
ttagaaaaccaacacaacag

*Solanum tuberosum CYTOSOLIC FRUCTOSE-1,6-BISPHOSPHATASE*

agctaagtctgctcttgtcactcaaaatgatgggtatccctctcgtcatccagtggttgtcaagtcctg  
ttaggaacacagtaaggatataaacaacattttgtggattcttgggtatttgagtgttctgtgttca  
cttggttaaaattgcacatatacgtagtgagaaactcaactggtgagtagcattgatccgtcaatcttg



tcgataactttgataaggatatttcagggcatcagacatgtcacctctatagaacttgggtcttttttt  
taaaaataaaaaataaaaatgtttggcatcatacgaacttctgttacttttaggctgtatccagaataaa  
atggtgtttcctcattctggaattagttgtttgcacacggacgactttcgaatctactaattgtgt  
tcgtccgtctcaaactggctcacactttgggtggcaattttacttctcaaggaagcaattacagaat  
atgaatgtcgtctcctcatatttatccgaacaataaaaaatgatatctgtttgcataatgcatgtaga  
tcacacaggggggggggggggggggatctagggagctaaaatctaatttatattagtagatgttgaat  
tccgttgggcttcattatgtgttttacatattcgtttctgaaccacccccacccgggtgaaaaacat  
tgctctgccactggctcaatgtattgacacaaaatgaacttcaaactgggcagggtgaattatgctctag  
gagcattgtattatctatgcaatgcatcaacaaggaagagatcttaaagccagaagtaattgatgca  
atcaaaagttatgcagctgcaggtggagtttagtacaagcttcagtaatttggctcaggctttcttaga  
tcaacatgttcctcagcttaattaaatggaggaaaccaaagattatgttgtaaaatcattttctatc  
ctagatgggtctatcggaacaatttattttactcctatccaattcattatattttcaaaagttatg  
aagtccacgaaatattgtgacgtgggtaagacgacccatgccaagccagtgggatataagaacaaaac  
atgtaataaagagaacaataatgagtttcgaaaagaacagaagtttagcataaggacgagaatccat  
tatcttagtgccaaccactaatcctatgtatcattctcctctttccacgtgtcatcctacacttcct  
tgccatcagattagatagcccgggttagtacctacactgtatatcaaaaaatacgtacaacatcatcaa  
acatatcatcgatcaaaggatatttatcttgatgtgctttcgccgtccattgtaacgagtttggtatga  
atgtgatatacaccactcagatatcaatataattttataaaaagaacaaaattgaatactagtaata  
tctatgtagatattttttttcaacaatcctgtaagttataaggataactcacttatatgtgacgtg  
gataatgaagagctaggcaggcagtgagagatagaacaaattaagcagagacgaaaaacaaatcagt  
taacagaatgacgaattggatcacgctttatcttagtgccaaccactgatcccatgcatcactctgct  
ctttccacgtggcatcctctgacgtcagatcagattcctctctttcttttttttttctgtatata  
tgagcatttttagtagt

*Discorea japonica DISCORIN 3 SMALL SUBUNIT*

agacttcgagactccttgatgatatacaactcctccacttcatgtaaaagttccagcttcttgagttt  
aatggagccaaaggaatgtttagccaatgtcttaaggacccccggagactagcaagttttttcgcaa  
gctgtaacgccccacatcccacggcgtcggggtagccccaccagagcgcacagagatcccgaaccct  
tccgcagtgagctaagccaactcgaataggaagggcctaggacgagagaggaaagttcgaagctcgag  
gcaaatgggaacatgatcagatccaagcgggtagacttttttgataagcctggggaaaagggtcaa  
gccactcactattgacaaggaatctatccaacttaaccagatgggatttgcttggccattgggtccac  
gtaaactttctacctaccgaaggtggctcccccaacccagggtccgacacaaaagtggtggcattacg  
gaggtcctccagggtttggggtagccggaacacttacaactggggtagaatatcgcattaaaatccccac  
aaacaatccacgggacttcaatgccagaaccacaatccctcagctgatcccagaaggcgcacttctga  
tcacgagcattaggtccatatacggtagtgcacgcaagagattgtctagtaggtcttattttta  
cctctttatttttaatttactccttaaaaatacttaagtgaattaatattccttaaaaatatagat  
attgcataaattgctaaagttttagaaggatttatagcatatatactcacgtacacgtatatctggaa  
gatttttttaaaatttttttatttacttttttatttttttatttttttaaaagagctaccactttagct  
ggtttatttttattgagtacaaatcctggacaacatgggttacaagaaaacaagcaactaaacatttta  
caaatacaaaattcaagctaagttgtatggaacgaatggtaaggtcttgtactgagagagatttctgta  
gtgttggaatgagagctctgtctgtttaggggaataataccctcttaacctattgggtgtgtgtgttt  
tatctactgccttctgtacggctccccatgtatgatataatggcaaccttgctttcagaaaataagaca  
aaatattctggttttaataaccacaaaacaaacactaccgtagacatttagaatttctccgctctcaaa  
agttaaaagaaaaaaaaggtctattgattctctctatcatatgtggctgagaggagaaaaacaaagc  
cttctaaggcttcatgccttcttaaaatccttgatcttattttttattttgtggattgggatacta  
atattaatttgttaaattatgatgacaattgcggaaaaaaaacaatttttgaaagattttaagagttat  
tataattttataaaataaacctaaaattttcattcaaaaacaggaagtgatataataaagaccaatat  
attgatatacattttgcaattaaagttaatacaaaatccttccctatttctattgtacaagtgaaataca  
agctactcatttccccaaacactgcacacaggaaaaaaaattattactctcttttggttttctgttc  
tcaggcgaaaaaaaatgaacgaaagaaaataataaccgggtcatatctctctctctcatatata  
tatcttatgaaaagtacttcaagggtgtctatgctattacttgtcttatcaacttctaaatcaacacc  
taccacgtctcctagcacttggttatacatggtagagcatctttaattacaaaaccacatccccacaca

ccattaatgaaatctataaattaagagggcacaactctaaaccactccaatctaagcattcgcaag  
gaattaagaaacataacaatc

*Arabidopsis thaliana* FRUCTOSE-BISPHOSPHATE ALDOLASE 2

Cctacacatccacttggccacctgttgtgcaatgatgacgatgagattgcagtgtctctcgactgatg  
atgtagacttcacaatctcttaaaaatcccagtacttaacctcagccttaagaaaacgcaggggaacta  
cgtcctcacaaaatctttctctttgagtgttaactttcagacgcacatctttggctctaaattctaaaaag  
gaaaattttaataaggttttcataatcatgggttactggattagcatataagtctatgggttgagaaac  
ttgagacacagactaacgaaacctctttccggatccaaaggtcctcttgtgtagttgacgtggtaaac  
tctctaccgtcaaatttagacattagctaactctgatcaataatctcggcagctcttaaaaaataaaaa  
ttagaaatgatacgaacctcataatctttctctttatcaaacaccatctttgtatctttataag  
cctggtgccactatcttttaattgaaaatgatgctgtttgtcttatgctttctgtcctggagttcaacat  
tatgacaatatgtatagtaaattagtgatatacaagacgtttgcaattcaagaaaaaaacttataaac  
taattaatattatggtccacggtgctacatattaactcttgatggttttatacatcttttctacatgc  
taatatgcttttaatatgtagcctaacggttataatgtttttcttaagaaacagtatcttgaac  
gaatcttaactatcttctgacttattcgatctttatctgattttttatccgtgtaaaggcaaacgattat  
tatgtaacgacgggcataaaaagagtatcgatcttctattcggagaaaaaaaaaagataaaaattgg  
agtgtatgtatatttcttgaattgagagtaatacaagattacggtccaggtggcggaatattattggc  
aaggtcacaagaacctcaataactgatctgaagagaaatataaatcc

*Cucumis melo* GALACTINOL SYNTHASE 1

tttaatttctaataatcttaatttgtactagaaaaagaaaaaaaaagagtcggattaattctctaccattgag  
tggaggatacttggatgcagttcaagttctcatctctccaatttgtcacgtgacagcggatgattaag  
catatgagtaggctgcaaaagattatagacgtagaagatgataccaatacaaaaggcgtaacttttcc  
cggatgacttttatactctttacaaaattggaagtcttattctatctacatcttaatttccagttggt  
ataatgaagaatagtctgaaaatgatatcaatctttctcaataccattcaattacgttaagat  
tattaggagctgccattattattattattattgttgttgttattattattattatgcaaccaagtttg  
atgtgaaattgtttgccaatctttactccaatcttgatgttgtttaaattacttttagatgggtataaag  
aatgaagttgaatttaagaaaaagaacaaagcctgaaagaatggaatacttaggtgtagaagatgac  
aacgtatttataacgctcgatagtgtaataaaaaatgcacacatttggatgccctttatgcttcttag  
aggctcagactttcccaaaaggctaagggtgattcaatcgtgtgggacatcttgttctcccatttgatt  
ctcgttttcattagacaaaattaacaaaaaaatagtaataattctattcttttaagtttgtgata  
ttacggtttatcctttgttaaaaaagtttatctttgaaatgtaagaattttagatagaatggtgaaatg  
aataagattttgaaaagttttgctgaatttcaataatataactctctaactttgggttaggaaaatt  
aagtgatgacaattatctctatttagaattagattataagtgatatttgagttatgcacttgacttgg  
tcgtgttggtaaatctttggatcacagaacaaaagaagttgcatgccaaagaaatcttaataagata  
tgggtgagatagtggtccggttggctctattggattggtggtatggtccagagaagaggagtgctatgg  
atacgcactaggtggataaatgattatagaggagatggtaattttatgaaatgtgttagagctttga  
tgtaataatataatcttttaagtggtgtttgtgatcgatggatttagatgagttccttattaacatgt  
tttcttgggttttctcgaggtgggttctcaacacttggtaacatgcatcatgtccacgagatgttct  
tcatcttatctcttgaatattatataatgatctcacacaatacaggttcgtctgaaaaatctttct  
ttatttgaatttttaggtatttattcttggagatttttttattcttaagtaaaggttcatgatt  
gaagttagaaatataggagttatttttaagagagagctcacactcaaaggagtcataaatctttt  
ttactaatttaggttgtgtaataaccttgtatcttatcgataagtatcacgatgtaatcatttaactat  
ctattaacgaaaatcttttttaggacacggtgcctcctagatagatgcaagttgtattgcaaaacttg  
tactctgttttttagttttttacatgttttactttagaactaaacctaaagttatggttatgtgtcaaat  
aaacttcttttaaaataatattaaaacttctcaaaataataggaaaaaaaagaaaaattcaaatataa  
tatataatataatattgtaataattagctttcattatcattgaattaaaaattgcatatacaagaat  
cgaataatgtggagaaagtagttttctttttcaactttgtgtagaggctaagctctctaaaatattgg  
cttcgactttgtacttttggatccgccaccacaatcagacaaacttccatttgatcattacctttatc  
gaatcaaattctttccctccaatctgtcacaatgtgaacataccatccaccttctgattttttgat  
tctaaataaaccttattagcagagatttttaaaattagattataaattataccaataaccctaataagac

tttttcaatagtttttctattttatttttttttttcttttgtgtgtatgagtttttccaccatttag  
aaaacacatttgaaatatacagaaccaaattgtttaatttgaaattggttttccataccatttttacia  
aatacatagtataaccaaagaactatagttttaagtagtgataatagtttaatttttaagacaaag  
aactaacaataatcattatcaaaaacactaccttaaaacagaattgaaatcaaattcatttgtttag  
gaatataatataatataatataatataatataatataatataatataatataatataatataatata  
agattctttgatcctccctaaattgtccatttttgccttgctacaaacttgcaaaaaagaaaaaaa  
aaaggtcatagatagaaatgaccataaattgaaatcataaagcaataaggatatacaaaaattattata  
tccaagagggatgagagataatcttaaaggtgcaaaagaatcttcttattgatggaagaagagaatac  
aaactcttccaacttttgatcaaaatgcccataatgccctccatctcaccttaagataggatattcc  
aagtcatattcatcccaccaataccaatatctaaaataataagtaacaaataattacaattacaata  
taaagtgcatagaaattaaacttaggggtatctataaaacttaaaacaatgttccccaaggctctataa  
atagcctccttcccatcccttcacaactcaagcttgaaggactaaaacaagaacttgtaagcttgccc  
ttcttattaagtccttcttgctccttccctcggagagaaaaaacttttggtggttcaaaagcacca  
aagtcaat

*Manihot esculenta* GLUCOSE-6-PHOSPHATE/PHOSPHATE TRANSLOCATOR

tgcaattattttaagttggtttctctataataatgaattttaaagatttttctaactaaatattttttt  
ctctcccttttgaaatattttaattcatattattttattattaaattatttttttaataaaatataatta  
tttgatataatagcaattaatttttaaaacttcaaggcaaatttaaatcgatatataatttttactatccac  
attcgatagagattcacgatagttgttcagaaagaaaatttcgagatatataattttttaaagtgatga  
cgagaaccatcagcctaatacaaaaattcgatacaaaaattttatcgttttagaaatttaattttatat  
tttaattatttttttaaatatttttaaatatttttcatatttttcatatatttaaaattttattttctattat  
aaatagcatctcttattttatttaaaaactcactttgcagaaaaattttaataagagtttttaatttttta  
tcttattttttctcttattttcatcttaacataacaatattgattaaaattctgacggaatttaaatag  
ttattttatcattatttttaattttttattttataaaaaaactgactaattaaattattttgatattttta  
aaaaatataactattttaattttatttttaaatattataaaaaaatttttaaatatttttaatatgaaaga  
attaattgataaatatcattttcaaaaatataatataatattttatgattgatagaaaaaaaataattaa  
gcatgtatttttgaaatttatacatatattattattatttttaaatcattttatataatttttaattaac  
aatataagaatcatatagcaaatattctattttaaaaatttttaaatatttaagatttttaattaaattgg  
tttttctttaaaaatggatcaaatcaatattctctttgtatcgaattggaatcaaatcgatttgaat  
ttgagaaaaattattttttttcttttagaaaaattaatcattatattgaaatgaaaataaacatttga  
aacaaaacactcaaaacagtcatttttggggccacattttctttaaaaaatttttaagagttaaataagt  
tttgatttactaataaaaatattattttttataaattaaatatttaaaaaatttagtatttttaatacaata  
taaaatttttaaaaaatacacagaaatagtaagaaaaataaaattttattatttaaaaaattatattaa  
attagaattttatttaaccttgcgcaaatgaggtataattgaaaaagaaaaattaaacttatttaattg  
ttagcaaaaattcaaaaagcttattttggaattttattttgcaggaaaaatggacggctggaaatacatga  
gaaaggggatggaaatatcctcccattcaacaattacatcaatcaatttggtgaaagttggccatgctg  
actaaataaaaatactattcagaaatttaaacctgttgaaactttcaaattcttcttgacggctgtgt  
ttagagattcagacatttttaaaaatgtggaaatattttatgaagctcgggtcaatgaacagaattttg  
gaaaaaataaaaatttgcttttgatttctcataaaaatccaaataaatgaaatattattacttaaaat  
aatattttgttaaattcattttcttatttgacttattgtgatgcaggcaattttctaaattgtatcattgc  
ttcacagactgagagtcattggcctcttcccatataaacaccctctcctccaacctctctccagtagca  
tacagcttcttttcatctccaatcccagacaacctctcctgtcctcacttcttcacaattctgggtt  
tttctcctatataatttcccctacattctcatatttttactggaacaaaacagagtttcaagaaatt  
ctctttcaagtattctttatctgtgtgcttcttttgataaccagtaacggttaacacattcttttggttg  
tagctgtaagcctgtactctactagcac

*Arabidopsis thaliana* GLYCERALDEHYDE-3-PHOSPHATE DEHYDROGENASE SUBUNIT A

Cctgcaggcatcaggctagtgatcaatgctatagcttgggctcctcatagctcttcccatatctgctcc  
gctggagatgattctcaggcgttgattttgggatataatcttccatgggacagcatggtgaaagtggtct  
ggatccgattctagcttacacagccggcgctgaggttgagcagcttcagtggtcatcttctcagcctg  
attggggtgccattgccttctctaacaagctgcagattctccgggtctgattatggttttacagatttc

tggttgataacttgatgtaaaaaactcggtgctattggtgattaatgatcttttgatctctgactctaa  
gcctcattgagtttcctttcatagtatggtctgtgtaggaactatgtaccttcaaaattgtgaataac  
tagctttagcattggatttgattagacgtatggaagttagtttgaacagagagcatgtgacataacg  
gggaactggaagtagattatgactaacaccagcatttatgtttctctgccctcgagctgatggagttg  
caggattttgtctgcctcaccatcgtatggaatgtgtagctttctatggtagttgttataagttttgt  
ctccattgtccatatcactttatgggtatgtagattttgtgaaattaggcatttgaacatcgtaacaga  
tgatgtattcttcattacttcaatacaggcatalagactctctgtccaacttaaaggcatalacaaggt  
ctgtggtttacaaaatcagctttactaaatcctttggccaatattctctcagccagtcctaagaacc  
tctgctctaaaaagtcttagctttgaaagtcagacaaatggagagcagccttatcctccttttataac  
cgtgaccacacacacaaatgaagaagcccaaataaaaggcccaaaaatctaaaaatagggtgaaggag  
ggactttgtgaatatgtgatcatagaaacatgaagagacaagagagtggtaaaacc

*Solanum tuberosum GRANULE-BOUND STARCH SYNTHASE1*

aagctttaacgagatagaaaattataataactccgttttggtcattacttaacaaatgcaacagtatct  
tgtaccaaactcctttctctcttttcaaacttttctatttggtggttgacagagtaatcaggatacaaa  
ccacaagtatttaattgactcatccaccagatattatgatttatgaatcctcgaaaagcctatccatt  
aagtcctcatctatggatatacttgacagtttcttctctatttggttatttttctgccaagtggaa  
cggagacatggttatggtgtatacgggaagctcgtaaaaaaaaaatacaataggaagaaatgtaacaa  
acattgaatggtggttttaaccatccttctcttttagcagtgtagcaattttgtaatagaaccatgcat  
ctcaatcttaataactaaaaatgcaacaaaattctagtggaggaccagtagcatttagatatt  
attttttattactataataataatttaactaacacgagacataggaatgtcaagtggtagcggtagga  
gggagttggttttagtttttagatactaggagacagaaccggaggggcccattgcaaggcccaagttg  
aagtcacagccgtgaatcaacaaagagagggcccataatactggtgatgagcatttccctataatacag  
tgtccacagttgccttccgctaagggatagccaccgctattctcttgacacggtgactgaaacctg  
ctacaaataaggcaggcacctcctcattctcacactcactcactcactcactcactcacacagctcaa  
caagtggttaacttttactcatctcctccaattatttctgatttcatgcatggttccctacattctatt  
atgaatcgtggttatggtgtataaacggttgtttcatatctcatctcatctattctgattttgattctct  
tgccactgtaatcgggtgataaatgtgaatgcttctctcttcttcttcttctcagaaatcaatttc  
tgttttgtttttgttcatctgtagcttggtagattccccctttttgtagaccacacatcac

*Manihot esculenta GRANULE-BOUND STARCH SYNTHASE1*

gtggaatggagattagtagcatcatagcgtgaactctcggcttttagatttagggcaaatataagggg  
acacttcaaaacgacgtagtataggtgatttcggttcggttcggtttaatcgaaatttttgaatctaa  
aattgaaccgaacccaaaatcaccgatttttcataaaattaaattcaaatcgaaatcgaaatataaaataa  
aaccgaacccaaatttttgattcgggttcagttcgatcgggttatttcggtttaaacggaatagtgctcac  
ccctagcagtgtaactttaatctatttttaaaattaaattaaattattttattataataat  
tataaatattttataataataatataatcattaatttaaaatagcagtaggtataaaataattttaaaaa  
atattattattataaattcttcttaattattactttaaaattacattatttactattgaaatcgtaaa  
ttatacattttaagaattagattatcattgtctttaatattaaataaataaataaattataatataata  
tgcattaatattttcattttataaaatattttatatttaaaaaataaataaataatattatatttaacttgg  
ttcaaaaaaatattatatttaatatatttttaaaatttttaaaatttttaaaatatttaaaaaatataaa  
ttataatttaaatataaatatttaaatggttaaaattaaatgtgaaataattaaatgtggactttttt  
tccttataaaaaatcatatagcacggaacaaacacaaccgctcattggttcaatcaatgaattgaaatg  
taggacctggcgaggtcccaccattactaatctcaaccacaacacaagtagaggttagaggtgttgag  
ctagtaaacttatagcatattcccactgataccctttaacctatgctaattgcaaatgcccacaatggg  
tcccacttcacgtgctctctccctgggaggtgcccagtagttgggagtagtttctcaaccagtagc  
gaagcgacacgtgtacatcaccaacagctacaatactcaccttctccttagcaaaatctttcagttg  
atcatcatattatagcatatcaaatctccactccaccacaaccaccagcggaaacctattttgctccta  
agcttgt

*Solanum tuberosum LEAF-SPECIFIC1*

gtgttcatctgttggacaagctaataatatctatthttgttgtctgaatcacaatthttcccatgataaat  
taaagccaaaattcggcttctcacaacctgatagaatctaathttatgactthttatcaaaaaaagaa  
gaagatagaatctaathttatgacatttaattgtagcattccttaaaaaattcccgattcaactaatc  
cttggagttcattthttcataggtggattthcatgctggagttactgtaaatagggttggattthtaca  
ttcttgcgagagtgatctgcattccagccccctctgaagcacaggagtccagctgcattthcaaatgatt  
acccaattacagactatggcagaccgcaccattagattthaatgtggcagaagaacatcaactccaat  
atthttgaaatcctattaatggctatcatacattagtagtactgtatttagtactgtccagaagcaaaaattg  
ttgtthtagaatattactthggttgcaaccgtatcagtgtthtgaacattthtcaaggccaaatacata  
atgggtgccttgaaatcaactctagthttattgaaatgatgtctattgagcacctatatgtgttgccagt  
attgccatgctthaacttagcattctgttaacaagtthtatgctggatgthtgaatcgaacatggagt  
thttcatgttgcttagaactatatgctthcagtgthtagcagtatcggaaggtaaatacagthttaaacac  
caaaagtagagagaaataaggaggaathtaactctthggatttgattcgtctthcttgtgggaatgggtg  
aactcgttaaccagctagggtgaaatgaactcaacttagthtcaaaattgtthtaagthtccattthttgg  
thtaagagaattgagthtgtctcttagctthttgaaatgatthtagthtcaaggactataathttacac  
gatattagagctagatccattgataggccgctthcttaaatgthtttggccttgtaathctgtthttca  
cattgattgactgaaatgagthtgtctctthctatatgatctcggataathctthttctcatgagctaa  
cttaagthtaggatatgagcthaactgtctctcaacaggcaacaaccatagaggaaccaatcagthtttt  
tctthttgtcctcctctctcttgcacgagtgacttagthaaatagaaaggaaaatacaaaaaatgtat  
aagaaacaagtcaatctctthgggtcccttaataatcaaagaaaaccaatgaaatgaactccaagtgcac  
aaaactaagataaggcaaggaaaataathttgtagthaaatgctatatattgataatgtthggtaata  
atattatctagaagcaatccacagaaggggtgccagtgthcaactthgtaaatcacaathtgaagthca  
tcactaatattattatcaagggacctgcaaaatgaaataaataathtactaactaagtagtgagagca  
atact

*Ipomoea batatas MADS-BOX PROTEIN SRD1*

ggctggtthtctaagacathttthtggthtaatccaaacctaatcaaaatattcccaacaagatcgaat  
gatctatggctacaaaccctatcccaacaaaaactacathtttagtacatcaaatthtaagthggcatgatt  
atthttatthttgttcgacaaagtagcatcaaaataaactcaaaaaaactacatcattcaaaaagact  
aattatcaggcatcaatgttagtatatgggaggtgggtgggttcgagcctcagthggagggcgttgctgtc  
tctthgttcttcagtagthttgagagagthaaathtatgaaacagatactacactgthaaatagagthcagtagc  
aatcaaaaaaaathttgtthtaataatctcctaatattatathttthtcaaccagthactatgctthtcgg  
ctthtcagaaggcagaagcctaaaaaathcaathtaagthttataaactthtaactthtccactthgtthtgagthaa  
ttgagthctthtcagaacggthgttagathttaggthggatgacaaatggthattccaaagthtcaagatath  
ttctthtttagathtttaggaathttgttagthctthtttaagthttagagthtactthaaaggatgacaaathtt  
ttatcccattctathttctaggaagaathttataatccgtacgtgtgacggctgccathtaattatagthgc  
ccattcathttthattgggaaaaagthactcatccathattthcattggcacggcaaccagthtttaata  
thttataacaataataacatathggaaccaaathgthaacctthtatcccacagaccacacathtacac  
atccaataaaactthgagccaaathtatathtagcgtthactgagthactgactaaaataththtttaaaa  
tatactaaaataththtaaaaaataththaaatagthaaathtatthaaatagaaaathtaathtaath  
caaagaathaccaactaaaactgataaaatgagaaaatathagthataathatthgatgathctthttgthaa  
thttthttthttatgatccgaaaathctthtggccataagaagagthaaatgacaaaththtaactaagaaa  
thaaatgagthttgctcctatgtgathtaathataaaagthgagathttgagctgthgatctathattthgath  
tagathcaacgactcaaaathgaggaathttthtttaaaaaatcgctthcctgthtaathtaathgctthta  
aaathtaagcacathtaactthtaaaathgacactthttthtttaactathgacctthgtthacathgthaa  
gthctgagthccaacaagthcaacathgtcccactgaggtcacaaccgthgacctcccactagggthaa  
gathcgctthcatgcccgtthgaccacaagthcctthtggthaaaaathgacactthaaagathgthaaactthaa  
cgcatctthgatgaaactgaccactthgagctthgcaactthatactthttthgagathaaagctthgthaaactth  
attathaatggthctathtaacathtaaaaaaaathaaagthttcacathcaathtaathatthttgttagthcaa  
athgaththaccgthgggtgthgactathcaggaaththaaathacacthaagthtggagggthtagthactthca  
athacactathgtctathgactthttthctctthttthttthtttagathtagthtaathatthaaathcccaathg  
thaaagthttacaccaaagthtgcgaaaathgtthgtgthcathttctthacagthtagthacaaaaathaaactth  
thtagthaaagthtacagthaaactthgathggcagactthttcacaaathgggagctthggathcctthgagga

acttactgcttttcttagagtcattaatgggtttggccaaacatagaaaagattagttgagcagtccttgc  
acactacttgagtaatcatctccattcttctacttattgacaatattctcttatgaaaaaacacactt  
gatcttataatcagttagggtttgaccgggtttattaaaggatagcctaccaactttgttgaacgacat  
atcatcatatcatgattcaaaagatgctcttttttattgtcatatttgtggcacaggatgagtacagt  
ttcgcatacaccatgatcatttttatcaaatcatactctataaaaccctgtcaagaaaagagaggaa  
gaaacgagaagaagaactcatccaagaaacaagaggaaacattattgctcatgattagatcgacttga  
acatgtactaatgccaatctcaaatcctacataggtgtgttagacaaatatttgttaattagctga  
ttgacttaatggatttgactagttgttaacattaattgattgtaggaaattgtttggtaaattagttg  
ttagttgatagttgattacatgaaaattactttctcaaaaagcttatcgaaaaactattttgaaacag  
ctttttgaaatttaacattttataacaataagttgttacaaaaagctaattaatcaataactcatatc  
cattgtttaaccatgtcaacaactaataataataataattgtttttaaaatataagttaaattt  
aattgataagctaactatattaccaaacataaccgtaatattttcttaaccgcggtatgggctaagata  
tgattgtatactattttgttgcgagcatgattaatacagtaataccatcatttaaagtggaaacca  
cattcgcagctgtttccgaaagcaaacagctaacatttgcaggttcttacttatgcattaatctggg  
ttataaaatccccatttccatgttgggtgtgaacaaccacctaaccctagcgtgttcaacaattctacc  
ctactatcatcccccaagacttccccgaccagtaataaaccgccttctcttccagtgatttcttca  
tttgactttgctatataatataatctgatctgctttcatctttcagtgatttcttcatttggatt  
tcttcagaggaggagaagg

*Solanum tuberosum PATATIN CLASS I*

tgcgtattagtttttagcgcgaagcactaaatcgtctttgtatactttgagtgacacatgtttagtga  
cgactgattgacgaaattttttctcacaatatttttagtgacgaaacatgatttatagatgacg  
aaattatttgcctcataatctaatttgttgttagtgatcattactcctttgtttgttttatttgtca  
tgttagttcattaaaaaaaaaatctctcttcttatcaatcctgacgtgtttaatataagattaaa  
aaatattttaatatatctttaatttaaaactcacaagtttaattttcttgcgtaacttaatttgtcaa  
atcaggctcaaagatcgtttttcatatcggaatgaggattttatttattcttttaaaaaataaagagg  
gttgagctaaacaatttcaaatctcatcacacatatggggtcagccacaaaaataaagaacggttgg  
acggatctattatataactaataaagaatagaaaaaggaaagtgagtgaggtgagggagagaat  
ctgtttaatatcagagtcgatcatgtgtcagttttatcgatatgactttgacttcaactgagtttaag  
caattctgataaggcgaggaaaatcacagtgctgaatctagaaaaatcttatacaatgtgagataaat  
ctcaacaaaaacggttgagtcctatagaggggtgtatgtgacaccccaacctcagcaaaagaaaacctc  
ccctcaagaaggacatttgcggtgctaacaatttcaagtctcatcacacatatatattatataatac  
taataaagaatagaaaaaggaaaggtaaacatcactaatgacagttgcggtgcaagtgagtgagata  
ataaacatcagtaatagacatcactaacttttattggttatgtcaaactcaaaataaaaatttctcaac  
ttgtttacgtgcctatatataccatgcttgttatatgccatggtacc

*Manihot esculenta PHOTOSYSTEM II SUBUNIT R*

catgtgaatgggtgggtaaaataggcaaagtaaaaaaccaaaaaaagtcaactagcaaaggcgtcgt  
catgactgattcagctgcgtttttttttttttttttttttgggaatttgtagacttaggaggaagg  
tcagcaaggacgaggaagcagagaatctatctatgctcgttcttcttcttttatttttttaattat  
tttttaggcacaattctcatatgttgaatatataatatttttaattacttaattactttcttataatt  
tttaattaccggaagatcaaaataattcaacctcaattttcaatgtttaatatgattatactcaaagt  
ttgacggctgaatatattataaaaattgatgtgagaggagatttttaagggtttttaattttttcat  
attatatacgaattttttttttattaaagcaaatgatattttattataaatatacagaggcgccatgat  
aacagtgagataagttagatttagcaagatattcaataagaatatttagataaagatttaatttatc  
ggattaattatcgttctgtaataagttcaatatttgactttaaaaataaaaatctatttaattttga  
ctttaaaaataaaaatttattaaataaaaaagacgggttaagagatcactaaaaattttatgtgaaaa  
ctctccgatactcaaattagaattgaaaacttcacgaaattaaggaaagtaagcagagagagaaaat  
aagagaatgggtgggttttgaattcttcatgagtgaccggttcgagagaaatgtgtcttttttcagagaat  
gagagatctcttttttagaattagtttgatacataaataactttttaataaaaattgatgtccctagtgt  
cacatttcttctaatagaatagagatatttttgtgtagatcaggtattacattaatgatggagtata  
ggataaaaatgtgaaactgatcgggttcataccttttatattaaatgggcggttatgattttttggac

taaattaaagaggcgataaatttatagaagattggtatTTTTaccctgacttcatactgactcatccg  
acctatatagaaataaacctTTTTcagttaatgaaatcagccacatcagcgTTTTaaactttggtgta  
gtaaagattTTTTaaggaggtcgatctgTTTgtcatttctagtctTTgagaaggtaaacttatatgTTC  
cggacttaaataaatttaagagtgttgctcgtatgattTTTatactcaatagattgaatttcttatcg  
aaaagattTTTcaattcacatatacaaatataatataatataatagattTTTatTTTTatacattatc  
atgctgtaattaaattaaaaaataatattgtcacaatttgaattTTTaaacttgtTTTaaaattgtg  
ccatctTTaatttgaatttattTTTcgatcaaatcaatcgatataattcacatattcatctTTaatttaa  
atTTtagTTTTatcattatgagattcaaattataattataaattaaaaaataaagaaaatatctaataaa  
ccttattTTTTgatttagTTTTggatttatttagTTTTattatataaaaaagtgattaatagattcaa  
TTaatttgaataatttattgtatagataaaaattgataaattaattgaataaagcagaatggaatac  
gtaaactgtcttatgctTTTattaaacataaaattTTTataattTTTTTTgagagaataaattTTTataa  
TTaatgatgtagaagattattgcaaatgTTTaaatgTTTaccactaaataaaataaattTTTTTTata  
aataattagaaccaatggagtgactccacgcgtgcaaggcatggatgaaaggTgaaggattTgcaacc  
accatctgataacgTTTgcaacatcatatccagatataaaaccacaaaacctggacacgtggTgaa  
gtgagaatcactattcagtaatttattTTTTattTTTTatttatcagtgcaacattTTTactTgaa  
aagattgaaaggcaaagaagagagaagagaagaaaacaa

*Arabidopsis thaliana* RIBULOSE BIPHOSPHATE CARBOXYLASE SMALL SUBUNIT 1A

aacattcacacgTTTTcatttgaatatcctctataatttatattgaattTggcacataataagaaac  
taattggTgatttattTTactagtaaatttctggTgatgggctTTctactagaaagctctcggaaaat  
ctTggaccaaattccatattccatgacttTcgattgtTaaacctattagTTTTcacaacatactatcaa  
tatcattgcaacggaaaaggTacaagTaaaacattcaatccgatagggaaagTgatgtaggaggtTggc  
aagacaggcccagaaagagatttatctgacttgtTTTTgtgtatagTTTTcaatgttcataaaggaaga  
TggagactTgagaagTTTTTTTTggactTTgtttagctTTgtTggcgTTTTTTTTTTgatcaata  
actTTgtTgggcttatgattTgtaatTTTTcgtggactctTTtagTTtatttagacgtgctaactTTg  
TTgggcttatgactTgtTgtaacatattgTaacagatgactTgatgtgTgactaatctTTacacatta  
aacatagTtctgTTTTTgaaagtTcttattTTTcattTTTTattTgaatgttatatTTTTctatatt  
tataattctagTaaaaggcaaattTTgctTTTaaatgaaaaaataatattccacagTTTcacctaa  
tcttatgcatTTtagcagtacaaattcaaaaattTcccattTTTTattcatgaatcataccattatata  
taactaaatccaaggTaaaaaaaaggTatgaaagctctatagTaaagTaaaataaaattccccataag  
gaaaggccaagTccaccaggcaagTaaaatgagcaagcaccactccaccatcacacaattTcactca  
tagataacgataagattcatggaattatctTccacgtggcattattccagcggtTcaagccgataagc  
gtctcaacacctctccttaggcctTTgtggcgtTaccaagTaaaattaacctcacacatatccacac  
tcaaaatccaacggTgtagatcctagTccactTgaatctcatgtatcctagacctccgatcactcca  
aagctTgttctcattgtTgttatcattatataatagatgaccaagcactagaccaaacctcagTcaca  
caaagagTaaagaagaaca

*Solanum lycopersicum* RIBULOSE BIPHOSPHATE CARBOXYLASE SMALL SUBUNIT 2

AattcatggggcattacaattaattagTaaactaattTTTaaataacactaaatcatattagtctctat  
aggTataatataactctggagTcactatctgtattTgggatcaacagTtacaaggtacgagTaaa  
gtctctgatccgacaaacaatccgtatatacctacctTcccgaattTcatgtataaaattatactaaa  
atattattTTTTctTgtattatccgattgaaaattatgTgaattcaacataaaaactctaaaaaaagaaa  
ataatgaaaattacaactTaaaagagTgtcTaaagTtggaaTcatggTattacataaagTtggaggaaa  
tataagcaagcaaaacagTactctagctatcaattTactTTTggactactatagTaaaatattTcaac  
ccccctctccccacaaaaaaaattTaaaataacaagTtgaaggactcaaaaaaaaaaaaaaaaa  
aactcaaaaaccaacctcaatcatacattcatatcctctTcctacccccatctTggatgagataagatt  
aacgaggtgctTcacgTgtcacctctattTgtggTgactTaaaaaaattTccaacctTtcatatgtag  
atattaagTaatTgtataatgttatcaagaaccacataacatatcaaaaaccttatcattTcattata  
TaaaaggatagTggacatcaaaaaggTtcatattgaaacaaaaaaagagagaagaagcaa

*Arabidopsis thaliana* RIBULOSE BIPHOSPHATE CARBOXYLASE SMALL SUBUNIT 3

Gttagaattcttttgataggtttacttccattagctctgaaatggaatcttatttataagtctgcctga  
aaaatcttaacaattgatattaataaaaacggaaagagtaatgaatatttttaagagcatctcgaatct  
atctctatttttattatatactctatttttgtattttttaactctaactcatctctattttcattt  
gtaaaatagaaatttctaatttttttctaaagcaaaaaatagagatttttatttttctcttattta  
tttttctaacgaatttttgaggaaccattgaagttaaaatataaatctctattatatttttctctct  
atattcagaaagaaaataatagaaacaaatattggagatgggttaaagctttttttttgtccggataa  
atatcatacaatataatttatgtaaatatcaaatttaataattttgtttataactattttttaatgcga  
ccttatttccaaagaaagtgttaagccaaattaaatcatacatggtaaataagaggtccaaaagacca  
aaagcattaaatttaaggtaatgctgctggtttcttttctccaaacgaaaggagccaaaagcaaccg  
atcaagtgcagaccagtaaccgcacattcacttcttttccccacaagagaaaagataagataatgga  
gttttctgccacgtggccttatcctagtgggtgctgaccgataaggggtgtcaacacctttccttaatcc  
tgtggcagtaaacgacgttatcatgaatcatggaccctttgatcatgagggc

*Solanum tuberosum SOLUBE STARCH SYNTHASE 3*

Ggaagaaatcttctctgtcttaaaaaattgacggttgatgttataagagtttttttttttttttttt  
ccttttacaattgaagtgcacaaaagagtgaatcacagtggatcgtgataacaaagaatgttctgaga  
gtattgctattgtgaattttattttatagcgtaaatgggtcaaatttgcttaattttgtgaaataga  
acaaatttatcctctagttggagacaaatataactcttgaactatacaaaaatagaataaatttttgtt  
atttttaatttatcgcccaatgatattaaagatagtttttttttttttaaatgaattgaaactttc  
gcatagttcaatttttttcttgcacaaatataaggaaaatttaaccttcttctagttttgaatt  
ttagaaatcttttcttctcttctctctaccacccattacccttttttctcttcttctcttctg  
aacaacgccatacaattttttatttcttttttccctcatttttttttaattccaatcaaatgtgat  
aatccaagtatagttaattttgataacatataaattataaagtaatgtgtaataatagtactatagt  
ataataagttaaataaatcaaaactcaataaatttagaccgctgctgctcactctctaggtctccata  
gccaaattttgtcgaacctttttgtctatttccaagaaaaaaagaagcctactgtaatttaaaaa  
attccacgtgtcaatatctaaattaccacgtcatatcgaaccaacaatttcaaccgtcagatttac  
aggtacaacgtaagcaaaatagagagcattacacagaacaacacacttcaggctgaaattgttagga  
ctcctccaatttgttatcgcagttcgtagaatctgaagaaagagtattattcttgattttttaataga  
tttttaaaaccccattaaagcaaatcgtatataattgcagcacagatacagagaggggagaga

*Solanum tuberosum STARCH PHOSPHORYLASE 1*

tcaagagtcaatgatcccaatatttttaacggatactattagctttacttttattatttttgactttc  
ctgttaagtataagatttgaaatgaatctcaatcatagtttattttattatccatgatgacgttgatt  
aagagtcatgaaacattacatgaggaaatagtacttgactgggatcttcttctcatctaaactgacact  
aaactcttttttcttcccttctccaatatccaacatgcaattagacgatgaacgaaatgtgatgaaaa  
atttgataaatgagagttcaaattttaacaaaatataaaaaacataatcaatttttttaattttta  
gaaatagagttattgtttaaatgatacattgaaattgcagtatatatcttatgaaataatggagataa  
cttaaatgaccaaacattattattttacacaaaagggggaaatagcaatttttgaccaaatatt  
ataactaaggaataggatgaaattataaaatgatttgctcgtttttttcttctcaaaaacgaaagaa  
ccgcacaagttgcggtatctcatgagatcattaccaatgcattaggtagagtaagatccacatcacta  
accttttctcgtcaatttttattttggccatataaaaaaaatatttatttaaaaaattagaagct  
aatatattattatgaagtttaattattgttattttaactatagtaattatttcaagtatattttt  
aaaatattaaatttatttatattcgaaagaagatgtaataaatgtatcaatcttctgtttcaatttat  
ataattcatgttatttttagtttgccataaaaagaatgatacatttgcagtggtgacacgatttgtaaaa  
atttatgcgtaactcattgtctatataatgataatcgcagcggcaagcagagatgaaagagatgcaagaag  
atttgttatctatttcaaaatataatgaatcttacttagacacaatgtatatagaacaaattatag  
taatagttgaccctataatgtggtaaaatacttgactattagggggtgtttggtagagtgattaaag  
aaatataatgcatatattaggtgtgtgtattagtagtaccttggtttggcacacttttcatgccatgt  
ataactaatgcatgtgtattactaataccaaggaattctaggtattagtaataaatagcattttaaca  
cttgcatagatcaaaataattacaaaactaccttaagcattttcattttctttgttgctataagtt  
tttatttttatttttattttgcttttctggtatcttttaatttggttggtgtcttaataagactttatggcc  
ttttaagtatcttttttaaaaaaatcaatttcaatataatttaaattttttttactattgtgacaa



taaatttgataaaaaaattatTTGccaactttcacaaaaatTTTTgacgcaatagtataactatTT  
aatactatTTTTTTTatTTTTTatTTataaaaaagatgaagagTTaatgatgTTTTaacaagatTTTT  
TTTTgatgTTTTtagcaaaaaactTTcttgcaaaggaagtgtacaaataaataaagtgtgaagggat  
TTTTgtaacatatattatTTaatagtaattatgcaagatttattatTTTTtaacatcaaaccaac  
aatgtataagaaataactTTgcataactaatgcacgactactaatgcaagcattactaatgcacca  
tTTTTgtatTTgttcttatacactctaccaaacgaccccttagagtgTgggtaagtaattaagTTtag  
ggattTgtgggaaatggacaaatataagagagTgcaggggagtagTgcaggagatTTTTcgtgctTTta  
TtgataaataaaaaaagggtgacatttaattTccacaagaggacgcaacacacacacttaattcctg  
TgtgtgaatcaataattgactTctccaatTctcatcaataaaataattcacaaTcctcactctcttat  
cactctcattcgaaaagctagattTgcatagagagcacaaa

*Manihot esculenta SUCROSE SYNTHASE 1*

tggcattgcatcagttgTTTTactctTTcaggatattcctctacgattctTgTTTTcaacagagTTgga  
TgaccaaccgtattatTTctTgtatgtaccaatggattagattTgtgtgcatTaataaacgagctg  
gtTggctggctaggcagcagaaaatgaattaaaatggctggctTTgtcgatcaagcatctTTatccgt  
TcattcccattgattTgaccactTctgctgcaactTcatcactgtccctacacaacattaccta  
ccaccagcaccaccggctctggcagttccccgtTTccattTctTTgaaagatctTTgTTTTcatcct  
TTTTtagctTgattTTtaagttattTgtgcacagttcattTcacacaagtaactagTTggagattaagt  
ccgtcagaagagTctgTTTTcgattgagTTtaaggTTaaaaagTatTTTTcagaaaaaatatcat  
gtTTaaaaaaaagcaatatgtgtTctTgacaaaatTaaattTaaatTTTTTaaataatTTTTa  
aaaagTgTTTTTaaatatgagTgctgTTaactTTcctctcgtTgctTgTTTTgaaattatcattTTc  
tagtagaatatactagaaatctTTTaaattaccataatacccttagccccgaaatctctcttattaaa  
TtcttaactTTTattaaagatattataagacaatgaaaaaatTattaaaatTTTactgCGTgcccag  
ctattTgTTTTTTTTTTTTTaaTTTTTTTTTattTgcagggTgTtgcaatgactTTTTTcaat  
TTTTccctTgTTTTctTactTTTTTctctataaTTTTTccaattctTctTTTTcaatcaccac  
TtcaattgCGTTTTccctTTTTattTctcTTTTTgCGTTTTgTtagTctattTctcTTTTattTct  
TTTTattTctgTttgctTcttattTTTTcccaagatTTTTgTTTTTgagTgTctgctTtagTgg  
ctTgcatacaagcctacaaggctctggagatctgctaaggactgtagTgTtccctTgatcatggcg  
TTTTactctTgctgcttatataaactTgctcaggctggcctagagaaaattTgcatatcatggcac  
tattagTgtTcaaaattTgattatcatgtaataagCGgctTgatctgTggTtaaaagTTTgactca  
actTacaacgTcatgatgctTTTTctTggTgactatgTtTgTctcataaggccaactTTTactagTTTT  
ctTTctaattggccgagTtccTTTTcaactTaaatggcggaaatagTtcagctctaaatTTTTctTctTg  
TgtTcaaaatTTcttatctatTTTTctgggtcaaaatTTTaaactTTTccacgaagaagTTTcaagct  
cctTctTTTTgatggTtctTgcatatgTgTTTTctTggagaattattTctctTactctgctTTattTct  
TtgCagggagTctTTcctTTgTcaatagaaaaaacagTtctTTctTctTgatcaaccattTTTT  
TaaatgggaatTTTTTTTTTctgctgTatcccacagctctTTTaaaaataaacctattattgatattg  
gatctTTatTTTTgcacaaggTtctgattctgTtggcactctTTgctaaattgTTTaaattatgTgtgc  
agtgatctatagatctTtaacatttatgTgctgcatTattTaaagacagTgTtcttagTcaacagTaca  
ctctTaaTctctaaatcaaatataaaatcaaaatggTcgGcagggTggtagTtagattTTTTTTT  
TactctTtagaatcactggTTTTgTtgggTTTTgactTtagggTgattatccaaatgcttatatact  
gatTTTTcagTtCGTTTTaataatccgTTTTTgTgattctTactattTgTTTTTgTtTcatctgaac  
TctTgcagagggTTTTctgatcataagct

*Arabidopsis thaliana SUCROSE-PROTON SYMPORTER 2*

gcatgcaaaatagcacaccatttatgTTTTataTTTTcaaattatTTaatacattTcaatattTcataa  
gtgtgattTTTTTTTTTTTTTgtcaattTcataagTgtgattTgtcattTgtattTaaacaattTgatcg  
cgcagtacaaataaacagTgggagaggtgaaaatgCagTtataaaaactgtccaataattTactaacac  
attTaaatatctaaaaagagTgTTTTcaaaaaaattctTTTTgaaataagaaaagTgatagatTTTTT  
acgctTtCGTctgaaaataaaacaataatagTttattagaaaaatgTtatcaccgaaaattattctag  
TgccactCGctCGgatcgaaattcgaaagTtatattctTTctTTTactaatataaaaaatcacaaga  
aaaatcaatccgaatatatctatcaacatagTatatgcccctTactatTgTtTctgactTTTTctctat  
ccgaattTctCGctTcatggTTTTTTTTTaaacatattTctcattTaaTTTTTcattactattatataact

aaaagatggaaataaaataaagtgtctttgagaatcgaacgtccatatcagtaagatagtttgtgtga  
aggtaaaatctaaaagatttaagttccaaaaacagaaaataatatattacgctaaaaaagaagaaaat  
aattaaatacaaaaacagaaaaaaataatatacgacagacacgtgtcacgaagataccctacgctatag  
acacagctctgttttctcttttctatgcctcaaggctctcttaacttcactgtctcctcttcggataa  
tcctatccttctcttctataaaatacctctccactcttctcttctccaccactacaaccaccgcaa  
caaccacaaaaaccctctcaaagaatttcttttttttcttactttcttggtttgtcaaat
